# Supplementary material
Source: ML conference proceedings conference paper supplement (https://openreview.net/forum?id=hsf4gi5iEN)
Supplement: supplementary_material [file NeurIPS_2025_supplimentary.pdf › NeurIPS_2025_supplimentary.pdf]

## 1 A Additional Results of TokMan

2 To further demonstrate the robustness and generalizability of our TokMan framework, we provide  
3 detailed comparisons across 20 benchmark layouts from the ICCAD2013-S/L datasets. As shown in  
4 Table 1, our method consistently outperforms previous state-of-the-art OPC approaches—including  
5 GAN-OPC[1], Neural-ILT[2], Devel-Set[3], Multi-ILT[4], and IL-ILT[5]—across all three key  
6 evaluation metrics: Edge Placement Error (EPE), mask shot count, and Turn-Around Time (TAT).

7 Compared to the SOTA, IL-ILT, our method achieves an average of over 20% improvement in EPE,  
8 and a 4-7 $\times$  reduction in mask shots, underscoring its manufacturability advantage. Importantly, this  
9 performance is achieved with minimal runtime overhead, and even with ILT refinement included, our  
10 TAT remains competitive with the fastest baselines.

11 In addition to numerical metrics, Figure 2 and 3 presents qualitative comparisons on several repre-  
12 sentative layouts, which is more critical than others. The masks generated by TokMan are not only  
13 visually cleaner and Manhattan-aligned, but also produce resist patterns that closely match the desired  
14 targets, validating the effectiveness of our discrete token correction process. Notably, TokMan avoids  
15 the wavy, curvilinear artifacts observed in other methods, preserving edge integrity and topological  
16 consistency, while effectively preventing feature bridging and line-end breakage, which helps ensure  
17 the functional reliability of the underlying circuit.

18 These comprehensive results reinforce TokMan’s strength in balancing fidelity, manufacturability,  
19 and efficiency, offering a production-ready solution for OPC under strict design rules.

| Bench | GAN-OPC[1] |        |       | Neural-ILT[2] |        |       | DevelSet[3] |        |      | Multi-ILT[4] |        |      | IL-ILT[5] |        |      | Ours |        |      |
|-------|------------|--------|-------|---------------|--------|-------|-------------|--------|------|--------------|--------|------|-----------|--------|------|------|--------|------|
|       | EPE        | #shots | TAT   | EPE           | #shots | TAT   | EPE         | #shots | TAT  | EPE          | #shots | TAT  | EPE       | #shots | TAT  | EPE  | #shots | TAT  |
| S1    | 11.56      | 960    | 10.54 | 7.70          | 1561   | 10.41 | 6.09        | 1159   | 1.53 | 4.48         | 7505   | 0.84 | 3.88      | 5416   | 2.95 | 3.67 | 332    | 1.16 |
| S2    | 10.30      | 754    | 10.46 | 5.30          | 1337   | 10.34 | 5.27        | 767    | 1.52 | 4.00         | 6772   | 0.84 | 3.92      | 5192   | 2.87 | 3.03 | 290    | 1.27 |
| S3    | 32.92      | 1476   | 10.49 | 29.56         | 1964   | 10.34 | 15.07       | 1334   | 1.55 | 9.75         | 6906   | 1.30 | 7.97      | 5446   | 2.90 | 7.56 | 374    | 1.05 |
| S4    | 8.22       | 498    | 11.08 | 4.22          | 904    | 10.35 | 5.88        | 303    | 1.54 | 2.55         | 7076   | 1.34 | 2.03      | 4220   | 2.83 | 0.33 | 132    | 0.69 |
| S5    | 4.32       | 1190   | 20.22 | 4.64          | 1948   | 16.36 | 4.09        | 1187   | 1.51 | 2.16         | 6742   | 1.31 | 1.81      | 5710   | 2.87 | 1.40 | 312    | 0.75 |
| S6    | 5.01       | 1134   | 15.30 | 3.24          | 1786   | 16.81 | 3.31        | 1313   | 1.52 | 2.43         | 7170   | 1.31 | 1.96      | 5687   | 2.87 | 1.60 | 392    | 0.71 |
| S7    | 2.99       | 613    | 15.09 | 2.07          | 1555   | 14.96 | 2.75        | 713    | 1.54 | 1.22         | 5856   | 1.32 | 0.84      | 5145   | 2.85 | 0.67 | 278    | 0.82 |
| S8    | 3.59       | 349    | 19.46 | 3.17          | 1009   | 14.96 | 3.41        | 635    | 1.55 | 1.97         | 6999   | 1.31 | 1.64      | 3970   | 2.86 | 1.30 | 169    | 0.69 |
| S9    | 7.00       | 1229   | 22.24 | 3.90          | 1813   | 26.13 | 4.19        | 1565   | 1.52 | 2.54         | 6485   | 1.38 | 2.12      | 5618   | 2.87 | 1.53 | 454    | 0.97 |
| S10   | 2.68       | 412    | 21.98 | 1.25          | 754    | 13.01 | 1.90        | 578    | 1.53 | 0.65         | 5837   | 1.38 | 0.81      | 3080   | 2.83 | 0.51 | 143    | 0.75 |
| L1    | 5.03       | 1971   | 22.09 | 4.04          | 2755   | 10.35 | 3.88        | 2404   | 1.52 | 2.40         | 6999   | 1.35 | 2.21      | 8061   | 2.93 | 1.99 | 725    | 1.85 |
| L2    | 5.31       | 1679   | 22.98 | 5.02          | 2498   | 10.35 | 3.54        | 2025   | 1.51 | 2.52         | 6774   | 1.30 | 2.02      | 8252   | 2.93 | 1.62 | 620    | 1.96 |
| L3    | 10.59      | 2115   | 22.51 | 13.35         | 3342   | 10.36 | 7.59        | 2606   | 1.52 | 5.16         | 7394   | 1.33 | 3.86      | 8655   | 2.96 | 3.08 | 750    | 1.69 |
| L4    | 4.17       | 1216   | 19.80 | 3.55          | 2245   | 10.36 | 3.46        | 1570   | 1.54 | 1.54         | 6851   | 1.32 | 1.40      | 7740   | 2.90 | 0.76 | 514    | 1.56 |
| L5    | 4.05       | 2401   | 22.13 | 3.56          | 2752   | 10.36 | 3.45        | 2503   | 1.53 | 1.85         | 6503   | 1.30 | 1.63      | 7992   | 2.93 | 1.14 | 724    | 1.22 |
| L6    | 3.58       | 2197   | 17.40 | 2.76          | 2690   | 10.38 | 3.27        | 2519   | 1.67 | 2.59         | 7047   | 1.41 | 1.86      | 8257   | 2.93 | 1.33 | 732    | 1.69 |
| L7    | 3.27       | 1557   | 10.50 | 2.35          | 2319   | 10.37 | 2.68        | 1769   | 1.51 | 1.46         | 6387   | 1.35 | 1.00      | 7310   | 2.89 | 0.90 | 515    | 1.25 |
| L8    | 3.20       | 1335   | 10.49 | 2.53          | 2575   | 10.40 | 2.76        | 1913   | 1.54 | 1.42         | 6536   | 1.32 | 1.22      | 7939   | 2.91 | 0.97 | 541    | 1.09 |
| L9    | 5.30       | 2616   | 10.48 | 3.44          | 2845   | 10.42 | 3.45        | 2739   | 1.52 | 2.27         | 6636   | 1.33 | 1.87      | 7433   | 2.94 | 1.23 | 778    | 1.39 |
| L10   | 2.77       | 1146   | 10.48 | 2.30          | 2143   | 18.61 | 2.32        | 1910   | 1.53 | 1.00         | 6742   | 1.28 | 0.98      | 7525   | 2.90 | 0.82 | 524    | 2.00 |

Table 1: Comparison of six OPC methods across 20 benchmark layouts with evaluation metrics: EPE, mask shots, and TAT.

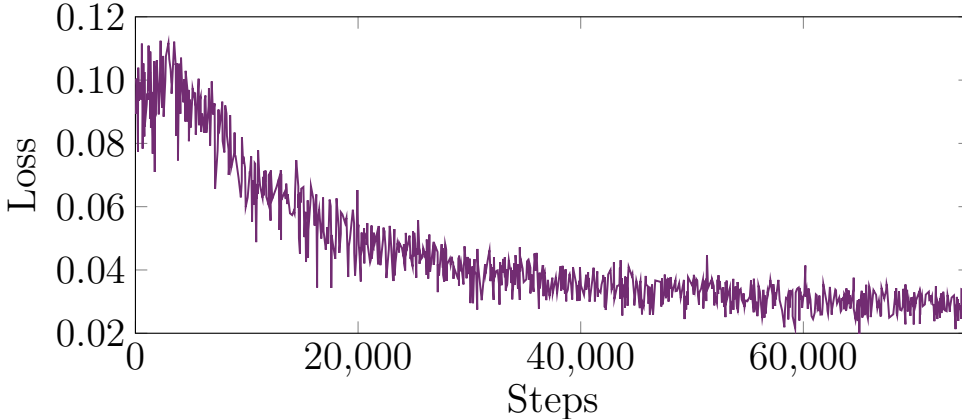

Figure 1: Training loss.

20 **B Results Visualization**

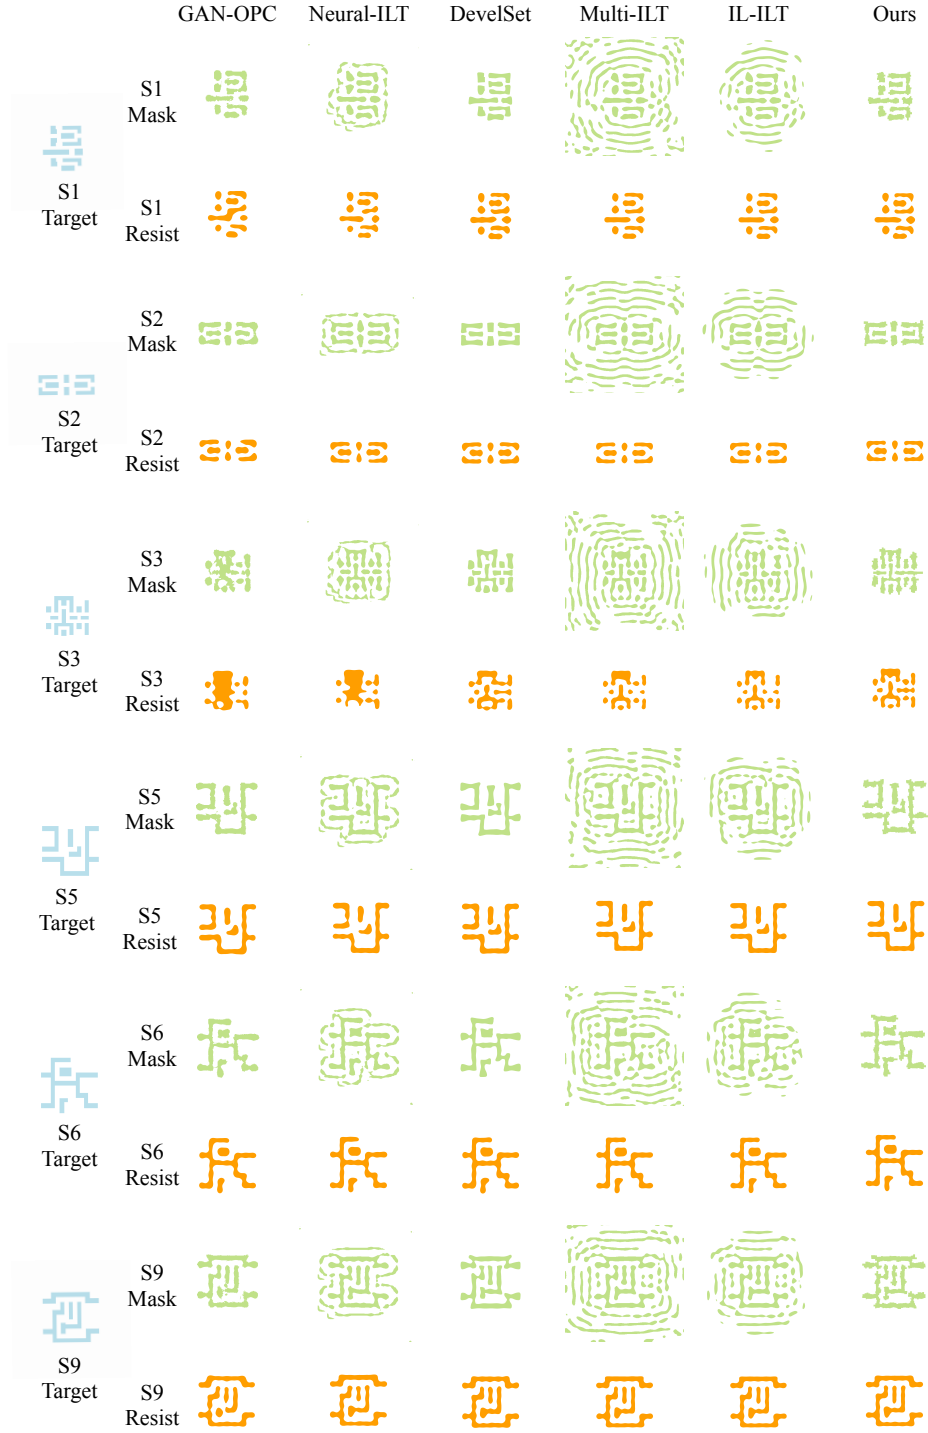

Figure 2: Visualization Comparison with SOTA on selected critical layouts of ICCAD13-S.

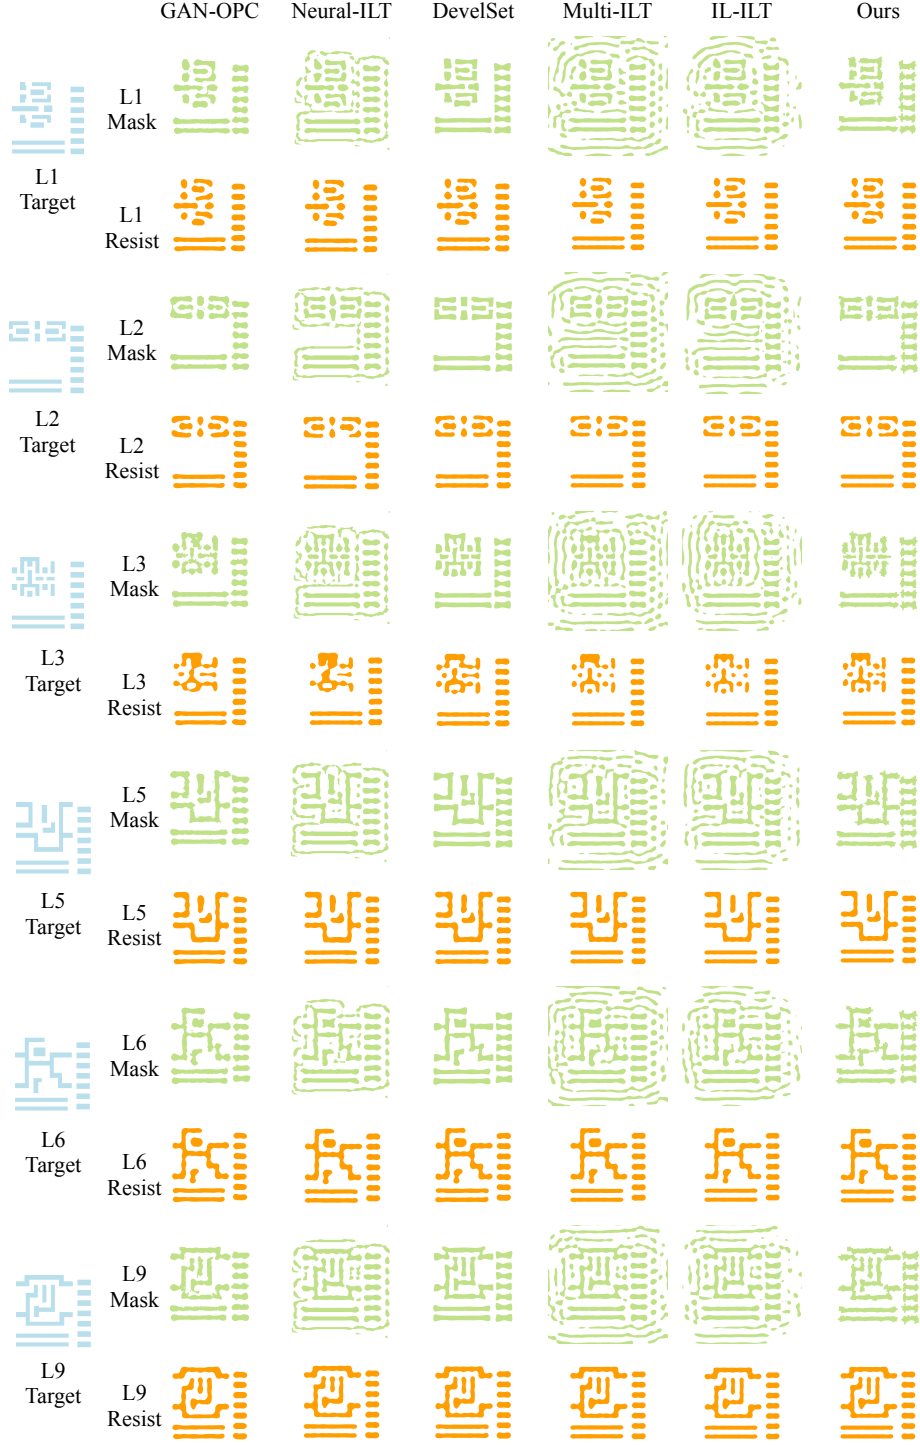

Figure 3: Visualization Comparison with SOTA on selected critical layouts of ICCAD13-L.

## 21 References

- 22 [1] Haoyu Yang, Shuhe Li, Zihao Deng, Yuzhe Ma, Bei Yu, and Evangeline F. Y. Young. GAN-OPC:  
23 mask optimization with lithography-guided generative adversarial nets. *IEEE Transactions on*  
24 *Computer-Aided Design of Integrated Circuits and Systems (TCAD)*, 2020.
- 25 [2] Bentian Jiang, Lixin Liu, Yuzhe Ma, Bei Yu, and Evangeline F. Y. Young. Neural-ILT 2.0:  
26 Migrating ILT to domain-specific and multitask-enabled neural network. *IEEE Transactions on*  
27 *Computer-Aided Design of Integrated Circuits and Systems (TCAD)*, 2022.
- 28 [3] Guojin Chen, Ziyang Yu, Hongduo Liu, Yuzhe Ma, and Bei Yu. DevelSet: Deep neural level  
29 set for instant mask optimization. *IEEE Transactions on Computer-Aided Design of Integrated*  
30 *Circuits and Systems (TCAD)*, 42(12):5020–5033, 2023.
- 31 [4] Shuyuan Sun, Fan Yang, Bei Yu, Li Shang, and Xuan Zeng. Efficient ILT via multi-level  
32 lithography simulation. In *ACM/IEEE Design Automation Conference (DAC)*, 2023.
- 33 [5] Haoyu Yang and Haoxing Ren. ILILT: implicit learning of inverse lithography technologies. In  
34 *International Conference on Machine Learning (ICML)*, 2024.
